# Supplementary material for: Cardiovascular magnetic resonance reference ranges for the heart and aorta in Chinese at 3T
Source: PubMed Central journal article supplement (PMC4830061; doi:10.1186/s12968-016-0236-3), 2016-04-12

## Correlation Between Phase Contrast and Volumetric Stroke Volumes

We have assessed left ventricular stroke volumes using phase contrast imaging in all individuals in the study. There was excellent correlation between phase contrast and volumetric stroke volumes ( $r=0.84$ ;  $P<0.0001$ ), without a significant sex-related difference (**Males**:  $r=0.78$ ;  $P<0.0001$  and **Females**:  $r=0.82$ ;  $P<0.0001$ ).

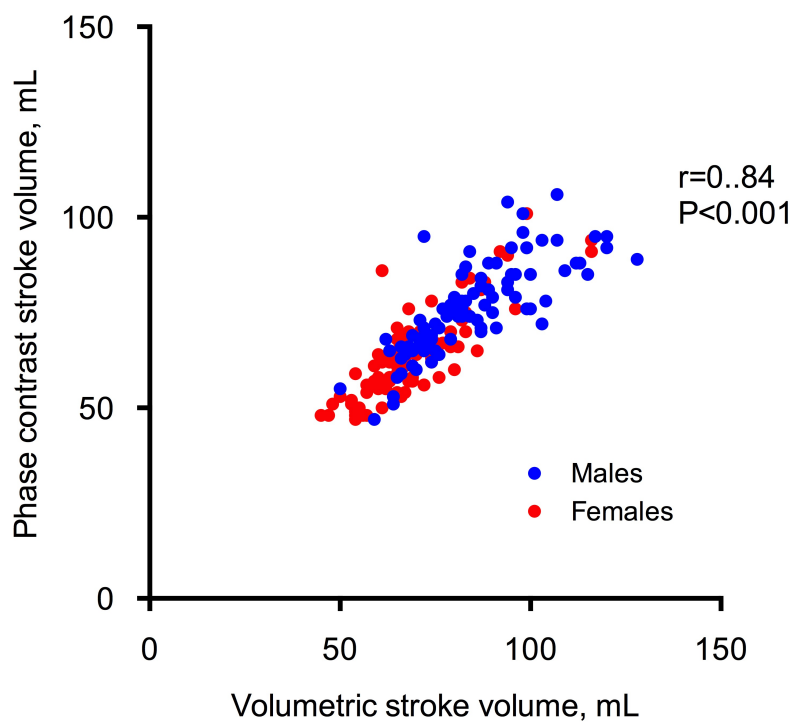

Supplement: 12968_2016_236_MOESM2_ESM.pdf [file 12968_2016_236_MOESM2_ESM.pdf]
