# Supplementary material for: Cardiovascular magnetic resonance reference ranges for the heart and aorta in Chinese at 3T
Source: Springer Nature journal article supplement (doi:10.1186/s12968-016-0236-3), 2016-01-01
Supplement: MOESM1 [file 10027486]

## Real-world CMR Measurements

|                                                              | (A)<br>Measured<br>Data | (B)<br>Real-world<br>Data | (B-A)<br>Mean (A+B) |
|--------------------------------------------------------------|-------------------------|---------------------------|---------------------|
| <b>CMR LV Measurements</b>                                   |                         |                           |                     |
| <i>Absolute values</i>                                       |                         |                           |                     |
| LV mass (exclude papillary muscles), g                       | 76±22                   | 76±24                     | 1±11                |
| LV end-diastolic volume, mL                                  | 128±28                  | 120±26                    | -9±10               |
| LV end-systolic volume, mL                                   | 51±14                   | 43±14                     | -9±7                |
| LV stroke volume, mL                                         | 77±17                   | 77±16                     | 0.1±9.8             |
| LV ejection fraction, %                                      | 60±5                    | 65±6                      | 5±5                 |
| <i>Values Indexed to body surface area</i>                   |                         |                           |                     |
| Indexed LV mass, g/m <sup>2</sup>                            | 44±9                    | 45±10                     | 0.6±6.3             |
| Indexed LV end-diastolic volume, mL/m <sup>2</sup>           | 75±12                   | 70±11                     | -5±6                |
| Indexed LV end-systolic volume, mL/m <sup>2</sup>            | 30±7                    | 25±7                      | -5±4                |
| Indexed LV stroke volume, mL/m <sup>2</sup>                  | 45±7                    | 45±7                      | 0.1±5.7             |
| <b>CMR RV Measurements</b>                                   |                         |                           |                     |
| <i>Absolute values</i>                                       |                         |                           |                     |
| RV end-diastolic volume, mL                                  | 143±35                  | 125±31                    | -19±16              |
| RV end-systolic volume, mL                                   | 67±22                   | 49±19                     | -18±14              |
| RV stroke volume, mL                                         | 77±16                   | 76±17                     | -1±11               |
| RV ejection fraction, %                                      | 54±7                    | 61±8                      | 7±7                 |
| <i>Values Indexed to body surface area</i>                   |                         |                           |                     |
| Indexed RV end-diastolic volume, mL/m <sup>2</sup>           | 84±15                   | 73±14                     | -11±9               |
| Indexed RV end-systolic volume, mL/m <sup>2</sup>            | 39±11                   | 29±10                     | -10±8               |
| Indexed RV stroke volume, mL/m <sup>2</sup>                  | 45±7                    | 44±8                      | -0.7±6.2            |
| <b>CMR LA and RA Measurements</b>                            |                         |                           |                     |
| <i>Absolute values</i>                                       |                         |                           |                     |
| LA area (4 chamber), cm <sup>2</sup>                         | 22±4                    | 19±3                      | -2.8±2.0            |
| RA area (4 chamber), cm <sup>2</sup>                         | 23±4                    | 18±4                      | -3.0±2.0            |
| <i>Values Indexed to body surface area</i>                   |                         |                           |                     |
| Indexed LA area (4 chamber), cm <sup>2</sup> /m <sup>2</sup> | 13±2                    | 11±2                      | -1.7±1.2            |
| Indexed RA area (4 chamber), cm <sup>2</sup> /m <sup>2</sup> | 12±2                    | 10±2                      | -1.7±1.3            |
| <b>CMR Aortic Root Measurements</b>                          |                         |                           |                     |
| <i>Absolute values</i>                                       |                         |                           |                     |
| Annular diameter, mm                                         | 21±2                    | 20±2                      | -1.0±0.1            |
| Sinus diameter, mm                                           | 29±4                    | 29±4                      | 0.4±2.0             |
| Sinotubular junction, mm                                     | 23±3                    | 24±4                      | 0.7±1.8             |
| <i>Values Indexed to body surface area</i>                   |                         |                           |                     |
| Indexed annular diameter, mm/m <sup>2</sup>                  | 12±1                    | 12±1                      | -0.3±0.9            |
| Indexed sinus diameter, mm/m <sup>2</sup>                    | 17±2                    | 17±2                      | 0.3±1.2             |
| Indexed sinotubular junction, mm/m <sup>2</sup>              | 14±2                    | 13±2                      | -0.4±1.0            |
